# Supplementary material
Source: PubMed Central journal article supplement (PMC3896095)
Supplement: NIHMS536872-supplement-supplement_1.pdf [file NIHMS536872-supplement-supplement_1.pdf]

## **Supplementary Information**

**Figure S1:** *Conservation of the DSL motif in fibulin-3 and canonical Notch ligands.* A) Representation and alignment of canonical Notch ligands of the Delta and Jagged families together with fibulin-3 (*Fib-3*). B) Alignment (using ClustalW software) of the N-terminal sequences containing the Delta-Serrate-Lag (*DSL*) motif involved in Notch activation. Fibulin-3 contains 8 of the 11 aminoacids that form the DSL consensus. This sequence is highly conserved in fibulin-3 across species. *b*: basic aminoacid; *a*: acidic aminoacid. Aminoacids in red indicate conservation of the DSL residues between fibulin-3 and the Notch ligands while those in green show divergence from the consensus in fibulin-3 or in the Notch ligands themselves. *VWFC*: vonWillebrand Factor consensus sequence; *EGF*: epidermal growth factor; *aa*: aminoacid.

**Figure S2:** *Specificity and efficacy of siRNAs against fibulin-3 and Notch-1.* siRNA sequences against human and rat fibulin-3 have been previously described (Hu et. al., 2009). Notch-1 (*NI*) validated siRNAs were purchased from Qiagen. A-B) Targeting siRNAs (two per target gene) were tested alone or combined. Knockdown of each target gene was quantified by qRT-PCR (A) and Western blotting (B) in rat (*CNS1*) and human (*G8*) cells. The non-targeting sequence *AllStars* siRNA (Qiagen) was used as negative control.

**Figure S3:** *Conditional knockdown of fibulin-3.* A) Lentiviral design used to induce fibulin-3 shRNA. The chimeric repressor TetR-KRAB targets the hybrid promoter TetOp-U6 and causes epigenetic silencing of a 2-3 kilobase region, preventing expression of shRNA and eGFP. This repressor is inactivated by Doxycycline (*Dox*). B) U251MG cells stably transduced with a control lentivirus were exposed to 20 µg/ml *Dox* (or vehicle) for 48h, fixed and stained with propidium iodide (red). Results show the efficient induction of the system. Bar: 100 µm. C)

Glioma cells stably transduced with control or fibulin-3-targeted lentiviruses were cultured in presence or absence of Dox during 48 h. Results from qRT-PCR demonstrate efficient knockdown of fibulin-3 mRNA (mean  $\pm$  SD: \*\*\*  $p < 0.001$ , two-way ANOVA for each cell type). D) Western blotting of serum-free conditioned medium from U251MG and CNS1 cells show efficient reduction of secreted fibulin-3 after shRNA induction. *BSA*: bovine serum albumin was added as loading control in the conditioned medium.

Figure S4: *Fibulin-3 is not a Notch target in glioma cells.* Glioma cells (U251 and CNS1) transfected with Notch-1 intracellular domain (NICD), Notch-1 siRNA, or their respective controls were processed for qRT-PCR. Results show that genes typically regulated by Notch (Hes1 and Hes5) responded to upregulation or downregulation of Notch signaling. However, fibulin-3 was not affected by these treatments (mean  $\pm$  SD: \*\*  $p < 0.01$ , \*\*\*  $p < 0.01$ , one-way ANOVA for each gene).

Figure S5: *Fibulin-3 knockdown slows cell growth and increases cell death.* A) CNS1 cells transfected with fibulin-3 or control siRNAs were serum-starved for 24 h, fixed, stained with propidium iodide and analyzed by flow cytometry. Results from a representative experiment (repeated in triplicate) show that fibulin-3 knockdown increased cell death (sub-G1 fraction) in serum-starved glioma cells. B-C) U251MG glioma cells were stably transfected with fibulin-3 or control shRNAs and subjected to antibiotic selection for two weeks. Once selection was completed, cells with stable fibulin-3 knockdown showed reduced viability (B) and clumped morphology over time (C), which prevented the use of these cells for long-term experiments (mean  $\pm$  SD: \*\*  $p < 0.01$ , two-way ANOVA).

Figure S6: *Knockdown of fibulin-3 in the tumor downregulates Notch-dependent genes and increases apoptosis.* A) Representative images of a G8-derived tumor transduced with control lentivirus. Nuclei were stained with DAPI and false-colored in red. Notice the invasive tumor cells (arrows) past the bulk of the tumor (dashed line) and the efficient activation of the lentiviral system (eGFP expression). Bar: 50  $\mu$ m. B) Control and fibulin-3-targeted G8 tumors (N=3/condition) were microdissected and processed for qRT-PCR. Results show significant knockdown of fibulin-3 mRNA in the tumor tissue as well as downregulation of the Notch-dependent genes Hes1 and Hes5 (mean  $\pm$  SD: \*  $p < 0.05$ ; \*\*  $p < 0.01$  by two-tailed Student's t-test for each gene). C) Cell proliferation (Ki67-positive cells) quantified in CNS1- and G8-derived tumors did not show significant changes after fibulin-3 knockdown. Bar: 100  $\mu$ m. D) In contrast, TUNEL staining in the same tumors showed a 3- to 4-fold increase in the number of apoptotic figures (arrowheads) after induction of fibulin-3 shRNA. Bar: 50  $\mu$ m (\*\* $p < 0.001$ , two-tailed t-test).

Figure S7: *Fibulin-3 is highly upregulated in high-grade gliomas and associates with the mesenchymal phenotype.* A) Normalized microarray results showing expression of fibulin-3 in glioblastoma, collected from the databases The Cancer Genome Atlas (TCGA) and Repository for Molecular Brain Neoplasia Data (REMBRANDT). Frequency analysis shows that fibulin-3 was upregulated 2-fold or higher over control levels in more than 80% of the samples from both databases. B) Normalized microarray results showing expression of fibulin-3 (probeset 201842\_s\_at) and fibulin-4 (206580\_s\_at) in grade III and grade IV gliomas, collected from the Gene Expression Omnibus dataset GSE4271 (49). Tumor groups are 1: WHO grade III primary; 2: WHO grade III recurrent; 3: WHO grade IV primary without necrosis; 4: WHO grade IV primary with necrosis; 5: WHO grade IV recurrent. The center of the bubbles shows the average

expression value in each group; the size of the bubbles represents the number of samples in each group. The results show that, for all tumor groups, fibulin-3 levels were higher in samples matching the mesenchymal signature compared with samples matching the proneural signature. Results were almost identical for fibulin-4.

A

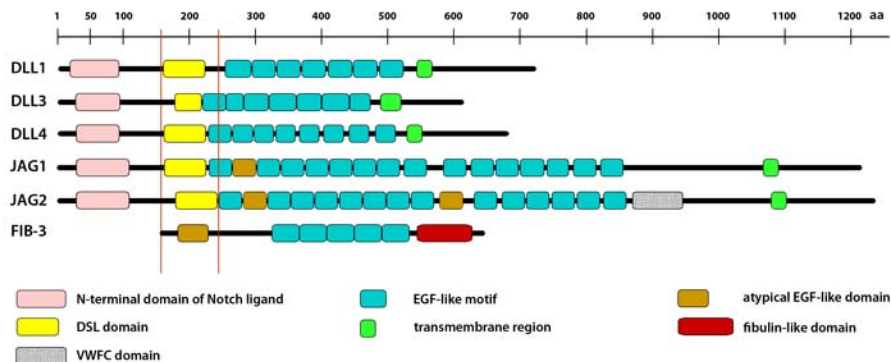

B

| DSL motif                       | -- C -- -- Y -- -- C -- -- C -- -- -- -- -- C -- -- G -- -- C -- -- G W - G -- C                      |
|---------------------------------|-------------------------------------------------------------------------------------------------------|
| Homo sapiens DLL1 (177-221)     | F V C D E H Y Y G E G C S V F C R P R D D A - F G H F T C G E R G E K V C N P G W K G P Y C           |
| Homo sapiens DLL3 (176-214)     | A R C E P P A V G T A C T R L C R P R S - - - A P S R C G P - G L R P C A P - - L E D E C             |
| Homo sapiens DLL4 (173-217)     | V I C S D N Y Y G D N C S R L C R K R N D H - F G H Y V C Q P D G N L S C L P G W T G E Y C           |
| Homo sapiens JAG1 (185-229)     | V T C D D Y Y Y G F G C N K F C R P R D D F - F G H Y A C D Q N G N K T C M E G W M G P E C           |
| Homo sapiens JAG2 (196-240)     | V R C D E N Y Y S A T C N K F C R P R N D F - F G H Y T C D Q Y G N K A C M D G W M G K E C           |
| Homo sapiens FIB-3 (27-70)      | T Q C T D G Y E W D P V R Q Q C K D I D E C D I V P D A C K - - G G M K C V N H Y G G Y L C           |
| Rattus norvegicus FIB-3 (27-70) | T Q C T D G Y E W D P V R Q Q C K D I D E C D I V P D A C K - - G G M K C V N H Y G G Y L C           |
| Mus musculus FIB-3 (27-70)      | T Q C T D G Y E W D P I R Q Q C K D I D E C D I V P D A C K - - G G M K C V N H Y G G Y L C           |
| Bos Taurus FIB-3 (27-70)        | T Q C T D G Y E W D P V R Q Q C K D I D E C D I V P D A C K - - G G M K C V N H Y G G Y L C           |
| Canis familiaris FIB-3 (27-20)  | T Q C T D G Y E W D P V R Q Q C K D I D E C D I V P D A C K - - G G M K C V N H Y G G Y L C           |
| <b>consensus</b>                | -- C -- -- Y -- -- C -- -- C <u>b</u> -- -- <u>a</u> -- -- -- -- C -- -- G -- -- C -- -- g w - G -- C |

**A**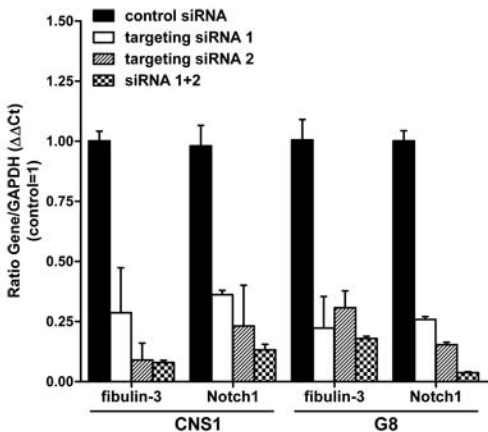**B**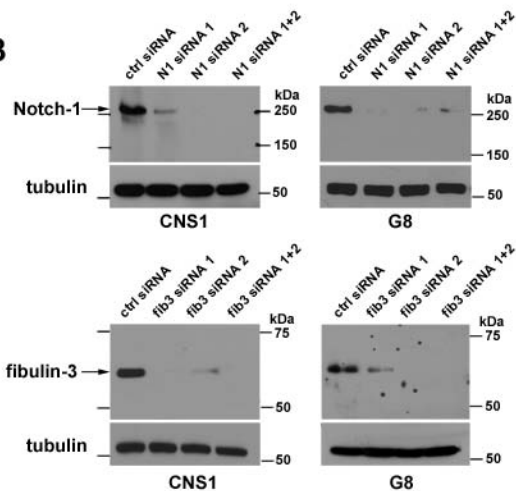

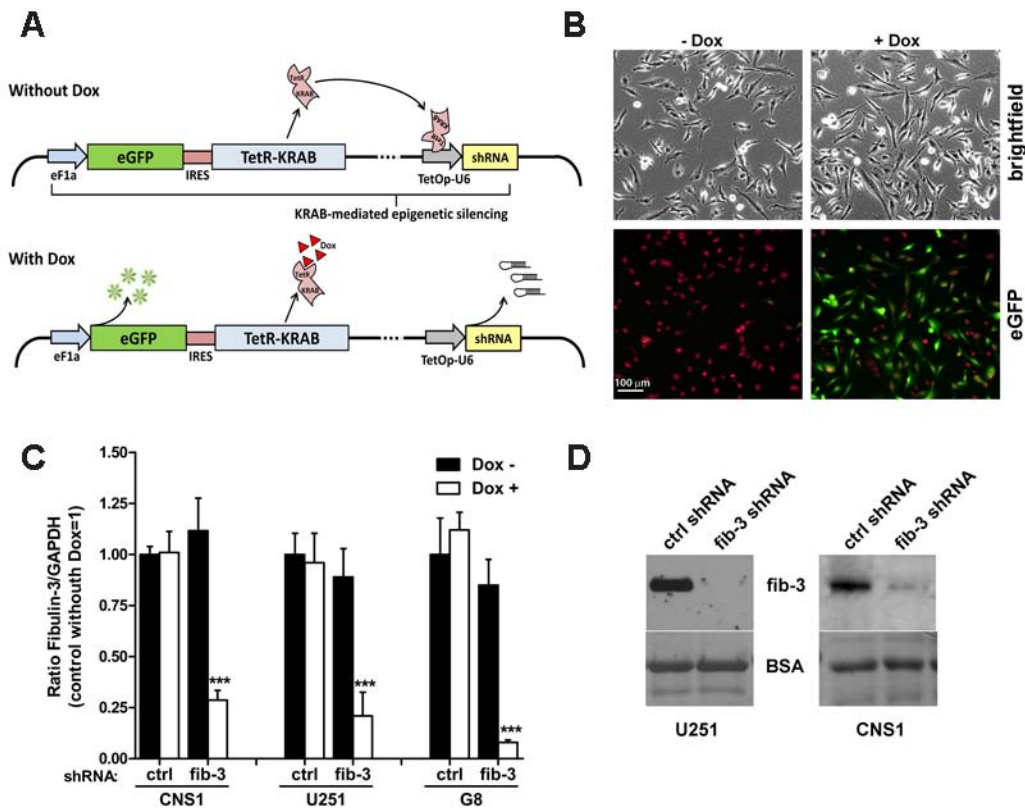

# Hu et al., Figure S4

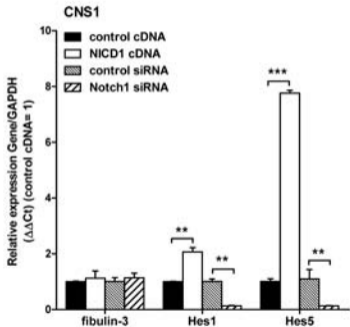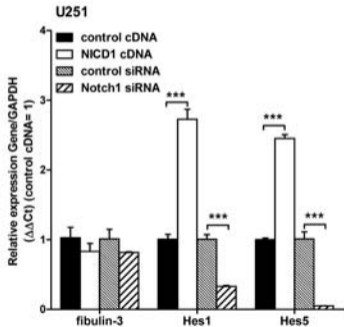



**A**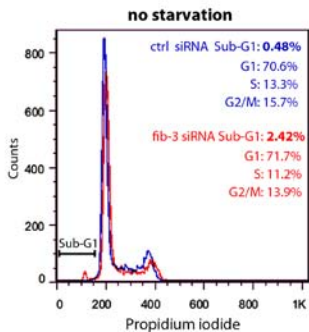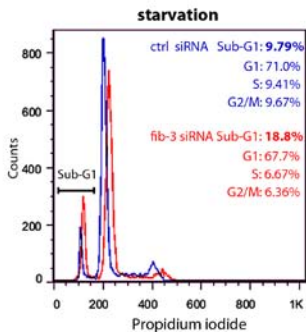**B**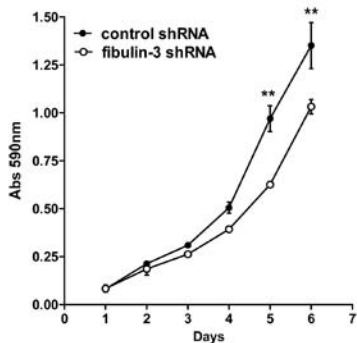**C**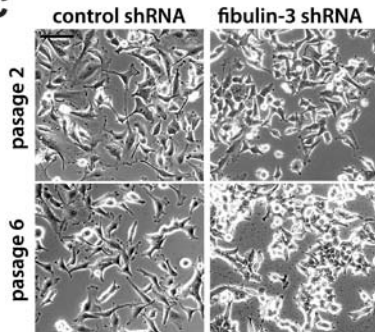

A

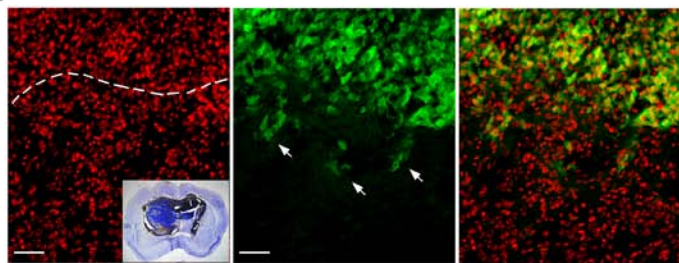

B

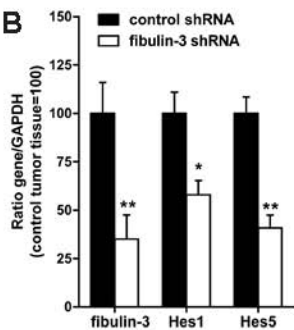

C

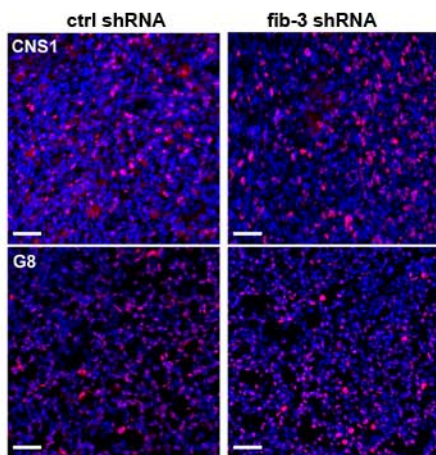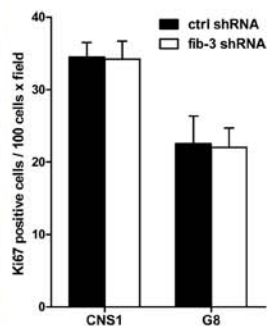

D

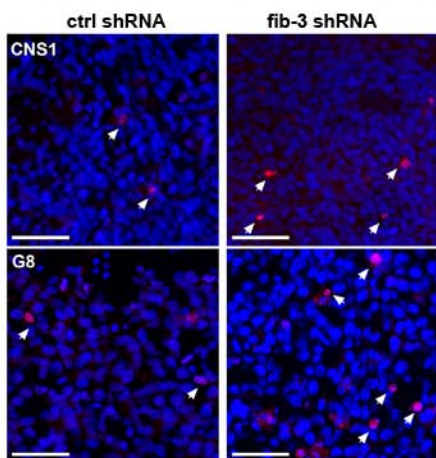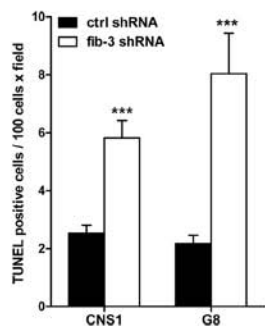

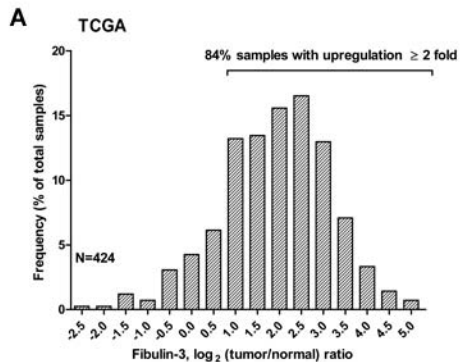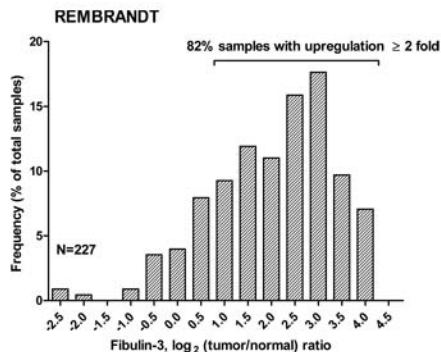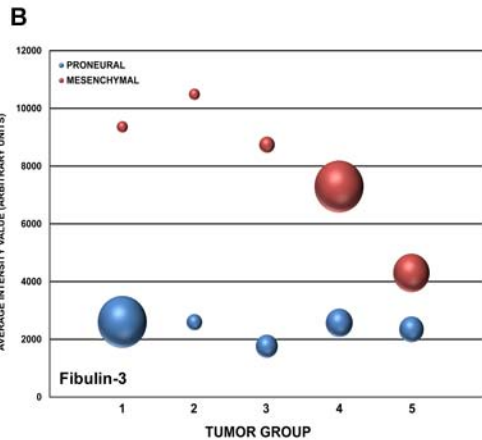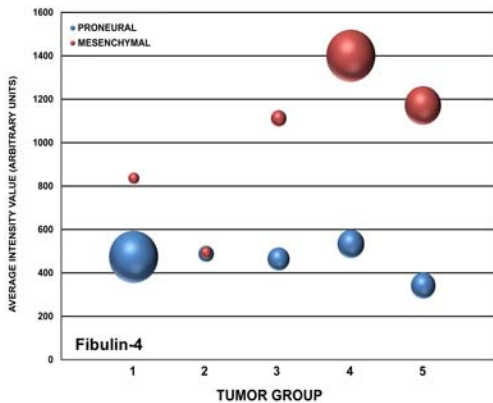

**Supplemental Table I:**

Antibodies used for Western blotting and immunohistochemistry

| <b>Antigen</b>                                   | <b>Source</b>                     | <b>Catalog number</b> |
|--------------------------------------------------|-----------------------------------|-----------------------|
| EGF Receptor                                     | Cell Signaling Technology         | 2232                  |
| pTyr <sup>1173</sup> EGFR                        | Cell Signaling Technology         | 4407                  |
| P42/P44 MAPK (Erk 1/2)                           | Santa Cruz Biotechnology          | SC-94                 |
| pThr <sup>202</sup> /pTyr <sup>204</sup> Erk 1/2 | Cell Signaling Technology         | 4377                  |
| Akt                                              | Cell Signaling Technology         | 9272                  |
| pSer <sup>473</sup> Akt                          | Cell Signaling Technology         | 4058                  |
| Notch-1 (human)                                  | Cell Signaling Technology, #D6F11 | 4380                  |
| Notch-1 (rat)                                    | Santa Cruz Biotechnology, #8G10   | SC-32756              |
| neopeptide Val <sup>1744</sup> -Notch-1 (NICD)   | Cell Signaling Technology         | 2421 and 4147         |
| Hes 1                                            | Santa Cruz Biotechnology          | SC-25392              |
| caspase-3                                        | Cell Signaling Technology         | 9662                  |
| Ki67                                             | Thermo Scientific                 | RM-9106               |
| Fibulin-3 (human)                                | Santa Cruz Technology, #mab3-5    | SC-33722              |
| Fibulin-3 (rat)                                  | Santa Cruz Technology, N-16       | SC-46100              |
| alpha/beta tubulin                               | Cell Signaling Technology         | 2148                  |
